# Supplementary material
Source: MDPI journal article supplement (https://www.mdpi.com/2571-6255/1/2/19)

Kolden and Abatzoglou Supplemental material

Table S1. Number of hectares on the landscape associated with each combination of fire types and total fires over time. NK = Non-katabatic conditions, SA = Santa Ana winds present, SUN = Sundowner winds present.

| <b>Total Fires</b> | <b>Non-katabatic</b> | <b>NK + SA</b> | <b>NK + SUN</b> | <b>Santa Ana</b> | <b>Sundowner</b> | <b>SA + SUN</b> | <b>ALL 3</b> | <b>Grand Total</b> |
|--------------------|----------------------|----------------|-----------------|------------------|------------------|-----------------|--------------|--------------------|
| 1                  | 854,328              |                |                 | 391,022          | 7,094            |                 |              | 1,252,444          |
| 2                  | 222,364              | 223,457        | 11,643          | 165,187          | 356              | 2,806           |              | 625,812            |
| 3                  | 36,527               | 119,490        | 278             | 55,222           |                  | 11              | 2,999        | 214,527            |
| 4                  | 7,497                | 48,174         |                 | 26,770           |                  |                 | 2            | 82,443             |
| 5                  | 1,517                | 15,889         |                 | 11,116           |                  |                 |              | 28,522             |
| 6                  | 437                  | 5,861          |                 | 2,342            |                  |                 |              | 8,640              |
| 7                  | 298                  | 1,396          |                 | 756              |                  |                 |              | 2,449              |
| 8                  | 131                  | 469            |                 | 2                |                  |                 |              | 602                |
| 9                  | 40                   | 84             |                 |                  |                  |                 |              | 125                |
| 10                 | 6                    | 28             |                 |                  |                  |                 |              | 34                 |
| <b>Grand Total</b> | <b>1,123,144</b>     | <b>414,848</b> | <b>11,921</b>   | <b>652,417</b>   | <b>7,450</b>     | <b>2,817</b>    | <b>3,001</b> | <b>2,215,598</b>   |

**Figure S1.** Highest frequency of non-katabatic wind fires is clustered around major interstates and highways, particularly at mountain passes.

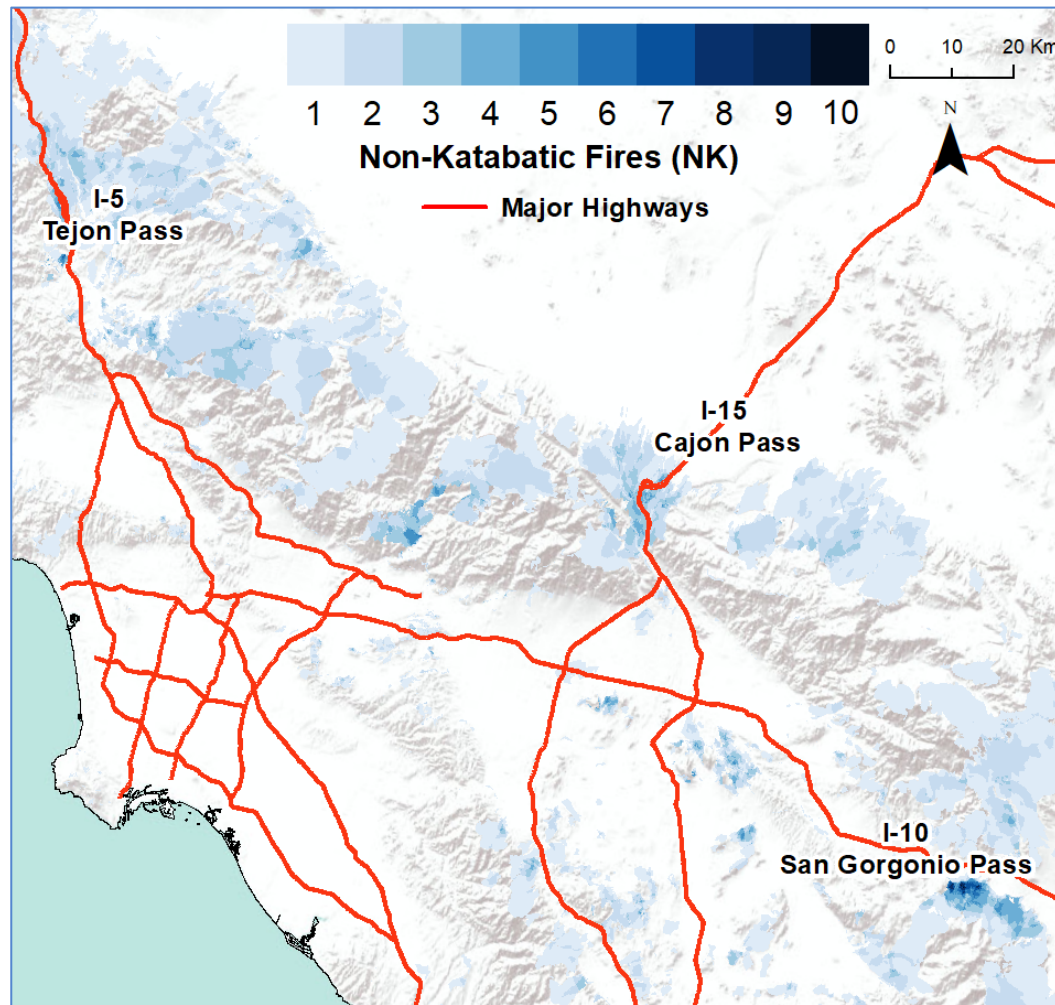

**Figure S2.** Year of previous fire prior to the 2017 Thomas Fire (legend shows colors for start of a given decade).

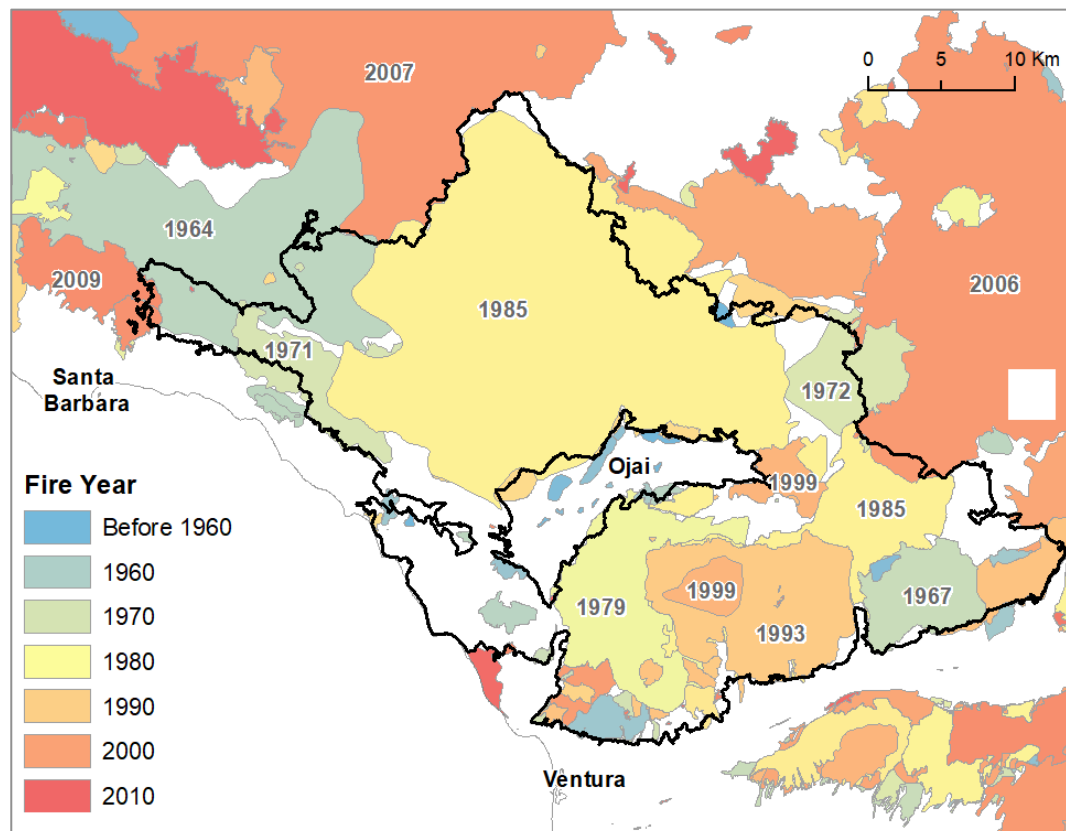

**Figure S3.** Percent of extreme fire danger days defined by the Burning Index exceeding the 95<sup>th</sup> percentile that occurred between September 15 and March 14. The red line denotes the inland penetration of coastal low clouds as delineated by [30].

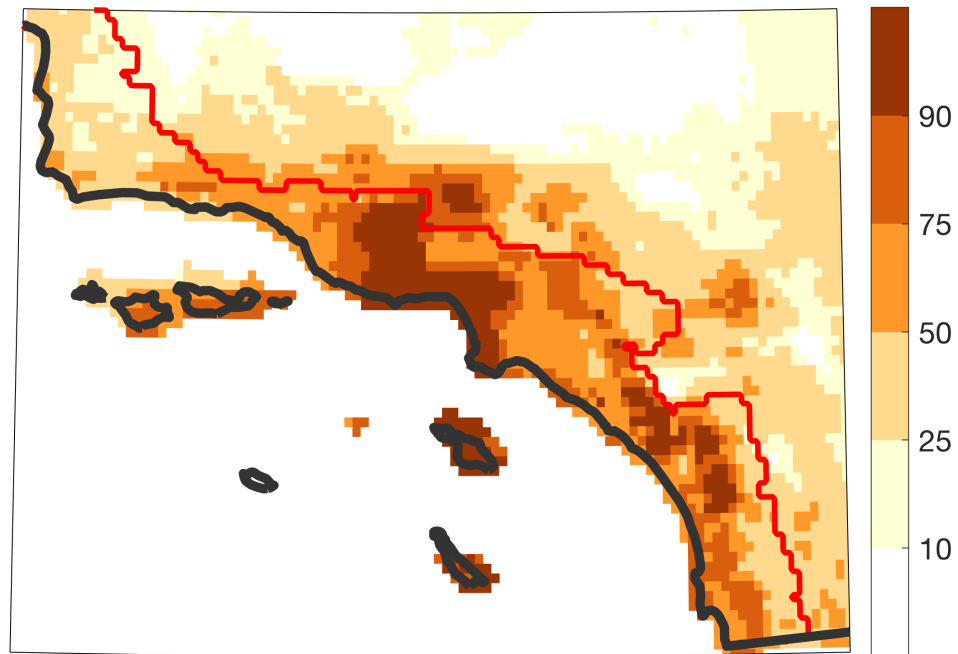

Supplement: s1 [file s1]
